# Supplementary material for: Examination of All Type 2 Diabetes GWAS Loci Reveals HHEX-IDE as a Locus Influencing Pediatric BMI
Source: PubMed Central journal article supplement — Diabetes. 2009 Nov 23;59(3):751–5. doi: 10.2337/db09-0972 (PMC2828649; doi:10.2337/db09-0972), 2009-11-23
Supplement: supp_db09-0972_DB09-0972_online_appendix.pdf [file supp_db09-0972_DB09-0972_online_appendix.pdf]

**Supplementary Table 1.** Surrogates used in this study (derived from the CEU HapMap)

| CHR | SNP on our Illumina Infinium™ II HumanHap550 BeadChip | SNP used in other system | r <sup>2</sup> | Genes Nearby         |
|-----|-------------------------------------------------------|--------------------------|----------------|----------------------|
| 1   | rs2793831                                             | rs10923931               | 1              | <i>NOTCH2</i>        |
| 3   | rs4411878                                             | rs4607103                | 1              | <i>ADAMTS9</i>       |
| 6   | rs4712523                                             | rs10946398               | 1              | <i>CDKAL2</i>        |
| 7   | rs1635852                                             | rs864745                 | 0.965          | <i>JAZF1</i>         |
| 9   | rs2383208                                             | rs10811661               | 1              | <i>CDKN2A/B</i>      |
| 10  | rs11257622                                            | rs12779790               | 0.833          | <i>CDC123-CAMK1D</i> |
| 11  | rs729287                                              | rs3740878                | 1              | <i>EXT2</i>          |
| 11  | rs163171                                              | rs151290                 | 0.951          | <i>KCNQ1</i>         |
| 12  | rs1353362                                             | rs7961581                | 0.973          | <i>TSPAN8-LGR5</i>   |

**Supplementary Table 2.** Effect of the G allele rs7923837 at the *HHEX-IDE* locus on pediatric BMI by gender.

N: number of individuals tested; Effect Size: regression coefficient for the test SNP; SE: standard error of the regression coefficient; Test statistic: additive model; P: unadjusted two-sided trend test *P*-value.

|                           | N    | Effect Size | SE      | Test Statistic | P        |
|---------------------------|------|-------------|---------|----------------|----------|
| <b>Discovery Cohort</b>   |      |             |         |                |          |
| MALE                      | 1857 | 0.04092     | 0.03993 | 1.025          | 0.306    |
| FEMALE                    | 1735 | 0.1472      | 0.04051 | 3.633          | 0.000288 |
| <b>Replication Cohort</b> |      |             |         |                |          |
| MALE                      | 1946 | 0.08304     | 0.03964 | 2.095          | 0.0363   |
| FEMALE                    | 1646 | 0.0436      | 0.04138 | 1.054          | 0.292    |
| <b>Combined Cohort</b>    |      |             |         |                |          |
| MALE                      | 3803 | 0.06225     | 0.02813 | 2.213          | 0.0270   |
| FEMALE                    | 3381 | 0.09741     | 0.02895 | 3.365          | 0.000773 |

**Supplementary Table 3.** Effect of the G allele rs7923837 at the *HHEX-IDE* locus on pediatric BMI by age bin in the combined cohort.

N: number of individuals tested; Effect Size: regression coefficient for the test SNP; SE: standard error of the regression coefficient; Test statistic: additive model; P: unadjusted two-sided trend test *P*-value.

|                          | N    | Effect Size | SE      | Test Statistic | P        |
|--------------------------|------|-------------|---------|----------------|----------|
| <b>Age Bin (yrs old)</b> |      |             |         |                |          |
| 2 to 6                   | 2244 | 0.1205      | 0.03616 | 3.332          | 0.000877 |
| 7 to 11                  | 1847 | 0.07482     | 0.04192 | 1.785          | 0.07446  |
| 12 to 18                 | 3093 | 0.04473     | 0.02896 | 1.545          | 0.1225   |

**Supplementary Table 4.** Effect of the G allele rs7923837 at the *HHEX-IDE* locus on pediatric BMI by individual ages in the combined cohort.

N: number of individuals tested; Effect Size: regression coefficient for the test SNP; SE: standard error of the regression coefficient; Test statistic: additive model; P: unadjusted two-sided trend test *P*-value.

|                   | <b>N</b> | <b>Effect Size</b> | <b>SE</b> | <b>Test Statistic</b> | <b>P</b> |
|-------------------|----------|--------------------|-----------|-----------------------|----------|
| <b><u>AGE</u></b> |          |                    |           |                       |          |
| <b>2</b>          | 555      | 0.04397            | 0.0743    | 0.5917                | 0.554    |
| <b>3</b>          | 540      | 0.1594             | 0.06834   | 2.332                 | 0.0201   |
| <b>4</b>          | 419      | 0.1585             | 0.08553   | 1.853                 | 0.0646   |
| <b>5</b>          | 351      | 0.1216             | 0.09438   | 1.289                 | 0.198    |
| <b>6</b>          | 379      | 0.1269             | 0.08714   | 1.456                 | 0.146    |
| <b>7</b>          | 374      | 0.2323             | 0.09286   | 2.502                 | 0.0128   |
| <b>8</b>          | 367      | 0.1742             | 0.09794   | 1.778                 | 0.0762   |
| <b>9</b>          | 340      | -0.09863           | 0.09608   | -1.027                | 0.305    |
| <b>10</b>         | 369      | -0.01515           | 0.09316   | -0.1626               | 0.871    |
| <b>11</b>         | 397      | 0.08216            | 0.08903   | 0.9228                | 0.357    |
| <b>12</b>         | 420      | 0.00608            | 0.08068   | 0.07536               | 0.94     |
| <b>13</b>         | 480      | -0.08932           | 0.0769    | -1.162                | 0.246    |
| <b>14</b>         | 503      | 0.1643             | 0.06957   | 2.362                 | 0.0186   |
| <b>15</b>         | 547      | 0.02947            | 0.06593   | 0.447                 | 0.655    |
| <b>16</b>         | 508      | 0.1319             | 0.06776   | 1.947                 | 0.0521   |
| <b>17</b>         | 386      | 0.06315            | 0.08567   | 0.7371                | 0.462    |
| <b>18</b>         | 249      | -0.07207           | 0.1037    | -0.695                | 0.488    |
